# Supplementary material for: Bovine In Vitro Oocyte Maturation and Embryo Production Used as a Model for Testing Endocrine Disrupting Chemicals Eliciting Female Reproductive Toxicity With Diethylstilbestrol as a Showcase Compound
Source: Front Toxicol. 2022 May 24;4:811285. doi: 10.3389/ftox.2022.811285 (PMC9171015; doi:10.3389/ftox.2022.811285)
Supplement: Supplementary file 1 [file Table1.docx]

**Supplementary table S1**: Number of COCs/oocytes (1) or cumulus cells (2) or fertilized oocytes (* and #) analyzed per experimental replicate per endpoint analyzed.

| Endpoint | Independent experiment | Control | 0.01% DMSO | 10-9 M DES | 10-7 M DES | 10-5 M DES |
| --- | --- | --- | --- | --- | --- | --- |
| Nuclear maturation | Exp. 11 | 28 | 32 | 28 | 28 | 27 |
|  | Exp. 21 | 32 | 29 | 27 | 37 | 36 |
|  | Exp. 31 | 30 | 29 | 33 | 36 | 34 |
| Mitochondrial distribution | Exp. 11 | 9 | 8 | 9 | 7 | 15 |
|  | Exp. 21 | 18 | 8 | 8 | 7 | 14 |
|  | Exp. 31 | 21 | 20 | 17 | 19 | 19 |
|  | Exp. 41 | 13 | 21 | 17 | 18 | 24 |
| COC expansion | Exp. 11 | 33 | 34 | 32 | 34 | 34 |
|  | Exp. 21 | 34 | 27 | 32 | 34 | 34 |
|  | Exp. 31 | 33 | 32 | 34 | 31 | 34 |
| Apoptosis/Necrosis quantification | Exp. 11,2 | - | n1: 12  n2 : 5356 | n1: 12  n2 : 7391 | n1: 12  n2 : 6742 | n1: 13  n2 : 9235 |
|  | Exp. 21,2 | - | n1: 12  n2 : 7148 | n1: 12  n2 : 9984 | n1: 12  n2 : 7124 | n1: 13  n2 : 9425 |
|  | Exp. 31,2 | - | n1: 12  n2 : 5012 | n1: 12  n2 :5843 | n1: 12  n2 : 7879 | n1: 11  n2 : 10037 |
| Cleavage and Blastocyst rate* | Exp. 1* | 94 | 96 | 100 | 96 | 94 |
|  | Exp. 2* | 97 | 97 | 97 | 96 | 93 |
|  | Exp. 3* | 86 | 90 | 86 | 89 | 88 |
| Cleavage and blastocyst rate# | Exp. 1# | 80 | 80 | 80 | 80 | 80 |
|  | Exp. 2# | 80 | 79 | 80 | 80 | 70 |
|  | Exp. 3# | 80 | 80 | 80 | 80 | 80 |

1 n-number of COCs

2 n-number of cumulus cells

* Embryos were produced from oocytes exposed to DES during IVM only

# Embryos were exposed to DES during IVC only, oocytes were not exposed to DES during maturation or fertilization
